# Supplementary material for: Multimodal Secondary Prevention Behavioral Interventions for TIA and Stroke: A Systematic Review and Meta-Analysis
Source: PubMed Central journal article supplement (PMC4368743; doi:10.1371/journal.pone.0120902), 2015-03-20
Supplement: pone.0120902.s003.pdf [file pone.0120902.s003.pdf]

## PROSPERO International prospective register of systematic reviews

---

### Secondary prevention lifestyle interventions for transient ischaemic attack, stroke: a systematic review

*Maggie Lawrence, Jan Pringle, Jo Booth, Susan Kerr*

---

#### Citation

Maggie Lawrence, Jan Pringle, Jo Booth, Susan Kerr. Secondary prevention lifestyle interventions for transient ischaemic attack, stroke: a systematic review. PROSPERO 2012:CRD42012002538 Available from [http://www.crd.york.ac.uk/PROSPERO\\_REBRANDING/display\\_record.asp?ID=CRD42012002538](http://www.crd.york.ac.uk/PROSPERO_REBRANDING/display_record.asp?ID=CRD42012002538)

#### Review question(s)

Review objectives:

- 1) To identify and critically appraise RCTs reporting secondary prevention lifestyle interventions for TIA/stroke.
- 2) To extract data from quantitative studies and meta-analyse, where possible.
- 3) To extract and collate data regarding educational content and behavioural change techniques and strategies.

#### Searches

Databases: AMED, ASSIA, Cochrane Systematic Reviews, CINAHL, DARE, DORIS, EMBASE, ERIC, HMIC, MEDLINE, PsycINFO, Social Services Abstracts

Grey literature sources: EthOS, Zetoc Conference Proceedings, pharmaceutical companies, key professionals, voluntary organisations

Restricted to: English language; years 1980-2014 (January)

#### Types of study to be included

Inclusion criteria:

randomised controlled trials

Exclusion criteria:

Epidemiological studies

Audit

Literature reviews

Clinical guidelines

Discussion/opinion papers

#### Condition or domain being studied

TIA/stroke secondary prevention, with particular reference to modifiable lifestyle factors.

#### Participants/ population

Inclusion population:

Adults (>= 18 years);

---

stroke (i.e. ischaemic stroke, haemorrhagic stroke, subarachnoid haemorrhage, minor stroke, transient ischaemic attack).

Exclusions:

other diseases/conditions;

carers/family members/family caregivers (as sole focus);

health professionals (as sole focus).

### **Intervention(s), exposure(s)**

Inclusion criteria:

Lifestyle interventions designed to address the prevention of TIA/Stroke recurrence

Multimodal (i.e. pharmacotherapy, education, and at least one lifestyle risk factor).

Exclusion criteria:

Public health/primary prevention initiatives and interventions;

Pharmacotherapy (as sole focus).

### **Comparator(s)/ control**

All comparators/controls will be considered as part of the review.

### **Context**

Studies will be sought and included from any relevant setting.

### **Outcome(s)**

#### **Primary outcomes**

Primary outcome measures:

Lifestyle: behaviour change re tobacco use, alcohol consumption, diet, physical activity; psychosocial stress, medication compliance.

Physiological outcomes: e.g. blood pressure, blood sugar, blood lipids, weight, Body Mass Index, waist-hip ratio, waist circumference.

#### **Secondary outcomes**

Secondary outcome measures:

Psychological outcomes: wellbeing; life satisfaction; Quality of Life (QoL); self-rated health.

Learning outcomes: knowledge of: signs and symptoms of stroke, appropriate response, risk factors; health-related attitudes &/or beliefs.

Cardiovascular recurrence: incidence of recurrent cardiovascular events.

### **Data extraction, (selection and coding)**

Quantitative data will be extracted from papers included in the review using a review-specific data extraction tool.

Data extracted will include details regarding study methods, participant characteristics, intervention content, and outcomes.

Four researchers will be involved in data extraction, with discrepancies being resolved through team discussion and consensus.

### **Risk of bias (quality) assessment**

Risk of Bias

Cochrane Collaboration Risk of Bias tool will be used.

### **Strategy for data synthesis**

Data analysis

Data synthesis

Quantitative data will be pooled, where possible, in statistical meta-analysis. All results will be subject to double data entry. Odds ratio (for categorical data) and weighted mean differences (for continuous data) and their 95% confidence intervals will be calculated for analysis. Heterogeneity will be assessed using standard Chi-squared analyses. Where statistical pooling is not possible, findings will be presented in narrative form.

### **Analysis of subgroups or subsets**

12-month data

### **Dissemination plans**

Dissemination: results will be disseminated through local, national and international publications and conferences, and through the (UK) Stroke Association.

### **Contact details for further information**

maggie lawrence

A256 Govan Mbeki Building

Glasgow Caledonian University

G4 0BA

margaret.lawrence@gcu.ac.uk

### **Organisational affiliation of the review**

Glasgow Caledonian University

[www.gcu.ac.uk](http://www.gcu.ac.uk)

### **Review team**

Dr Maggie Lawrence, Glasgow Caledonian University

Dr Jan Pringle, University of Dundee

Dr Jo Booth, Glasgow Caledonian University

Dr Susan Kerr, Glasgow Caledonian University

### **Collaborators**

Professor Martin Dennis, University of Edinburgh

### **Anticipated or actual start date**

01 May 2012

### **Anticipated completion date**

30 June 2014

### **Funding sources/sponsors**

The Stroke Association

**Conflicts of interest**

None known

**Language**

English

**Country**

Scotland

**Subject index terms status**

Subject indexing assigned by CRD

**Subject index terms**

Acute Coronary Syndrome; Health Behavior; Humans; Ischemic Attack, Transient; Life Style; Secondary Prevention; Stroke

**Stage of review**

Completed but not published

**Date of registration in PROSPERO**

10 August 2012

**Date of publication of this revision**

17 June 2014

**Stage of review at time of this submission**

Preliminary searches

**Started**

Yes

**Completed**

Yes

Piloting of the study selection process

Yes

Yes

Formal screening of search results against eligibility criteria

Yes

Yes

Data extraction

Yes

Yes

Risk of bias (quality) assessment

Yes

Yes

Data analysis

Yes

Yes

---

**PROSPERO**

**International prospective register of systematic reviews**

The information in this record has been provided by the named contact for this review. CRD has accepted this information in good faith and registered the review in PROSPERO. CRD bears no responsibility or liability for the content of this registration record, any associated files or external websites.

---
